# Supplementary material for: An effective method in modulating thermally activated delayed fluorescence (TADF) emitters from green to blue emission: the role of the phenyl ring
Source: Royal Society of Chemistry journal article supplement (doi:10.1039/d3cp05632e), 2024-01-01
Supplement: d3cp05632e1.pdf [file d3cp05632e1.pdf]

## Supporting Information

### **An effective method in modulating the thermally activated delayed fluorescence (TADF) emitters from green to blue emission: The role of the phenyl ring**

Lijuan Wang, Zhongqi Ge, Lin Xu and Yan Song\*

School of Materials Science and Engineering, Harbin Institute of Technology at Weihai, 2West Wenhua Road, Weihai, 264209, China

\*Email: sy@hitwh.edu.cn.

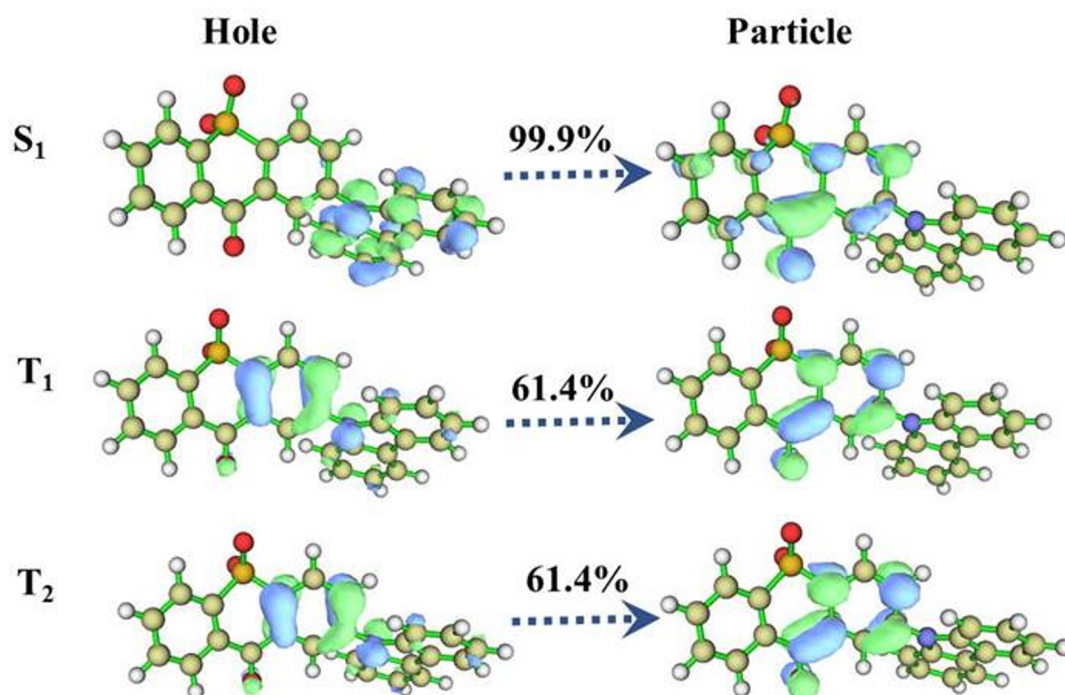

**Figure S1** The natural transition orbitals (NTOs) of  $S_1$ ,  $T_1$  and higher triplet states for CzSOXO.

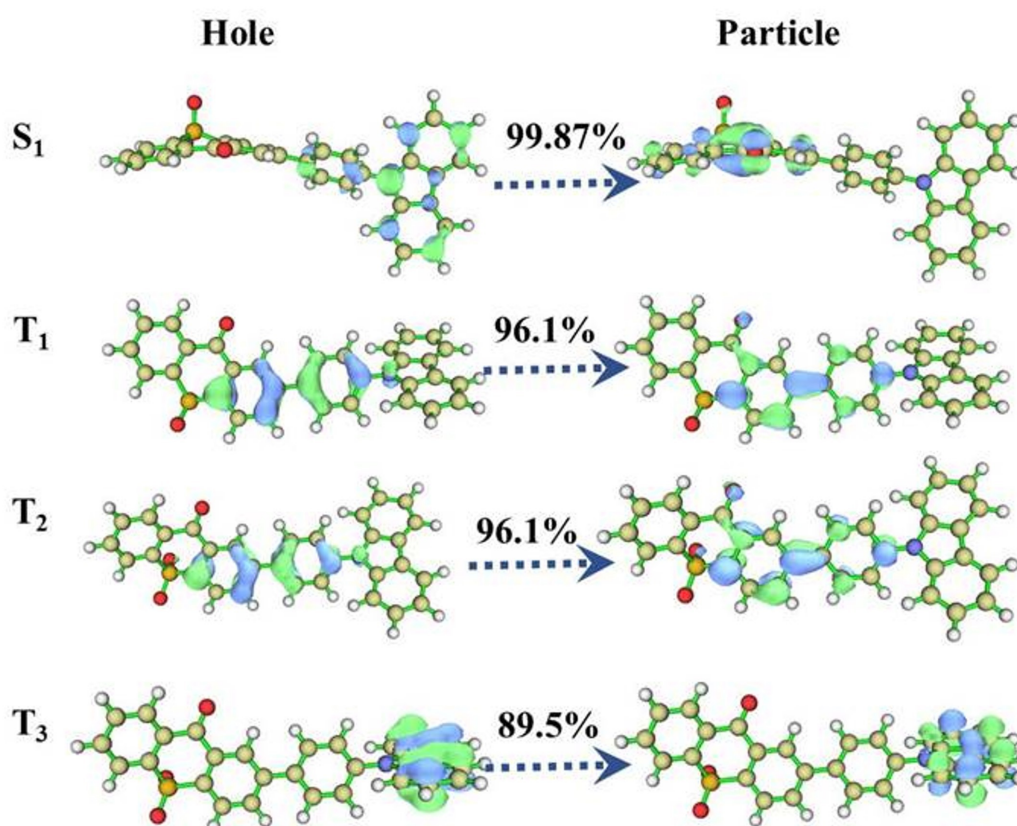

**Figure S2** The natural transition orbitals (NTOs) of  $S_1$ ,  $T_1$  and higher triplet states for Cz-Ph-SOXO.

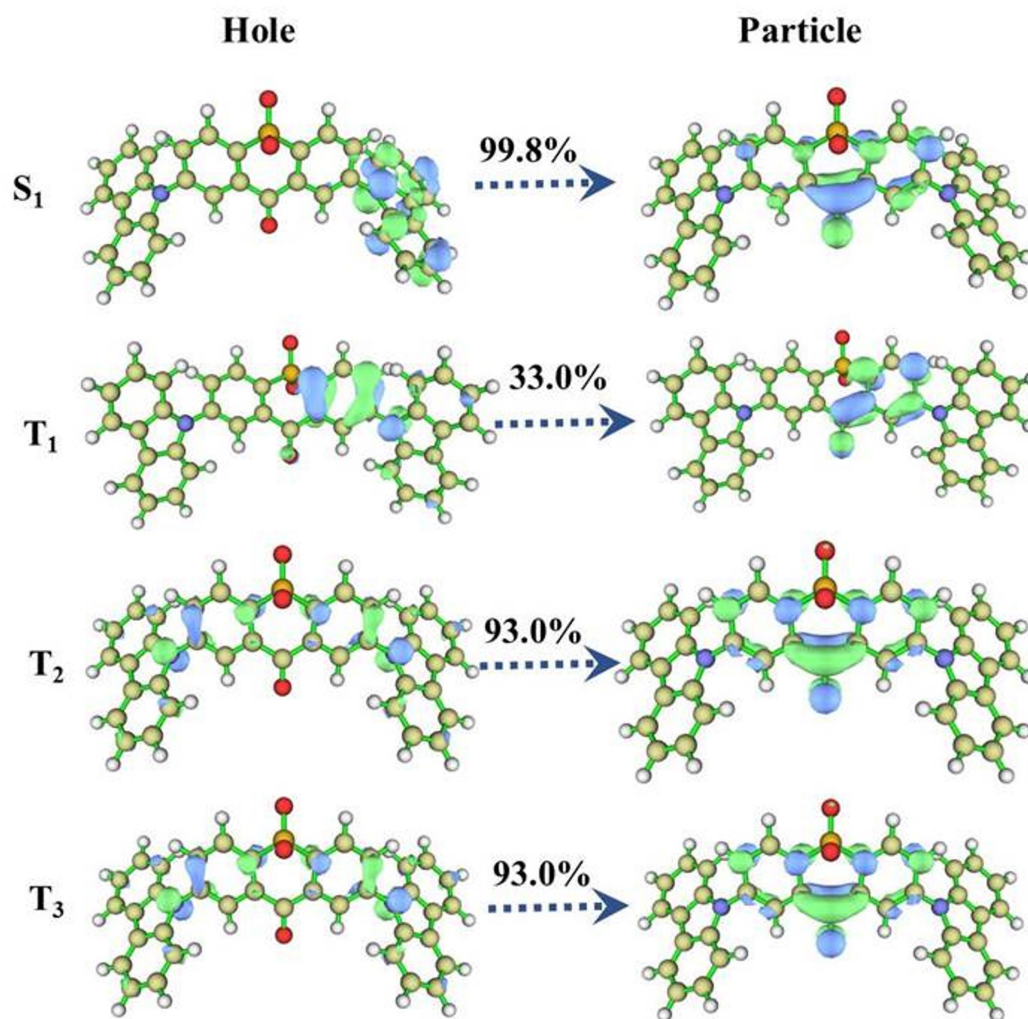

**Figure S3** The natural transition orbitals (NTOs) of  $S_1$ ,  $T_1$  and higher triplet states for DCzSOXO.

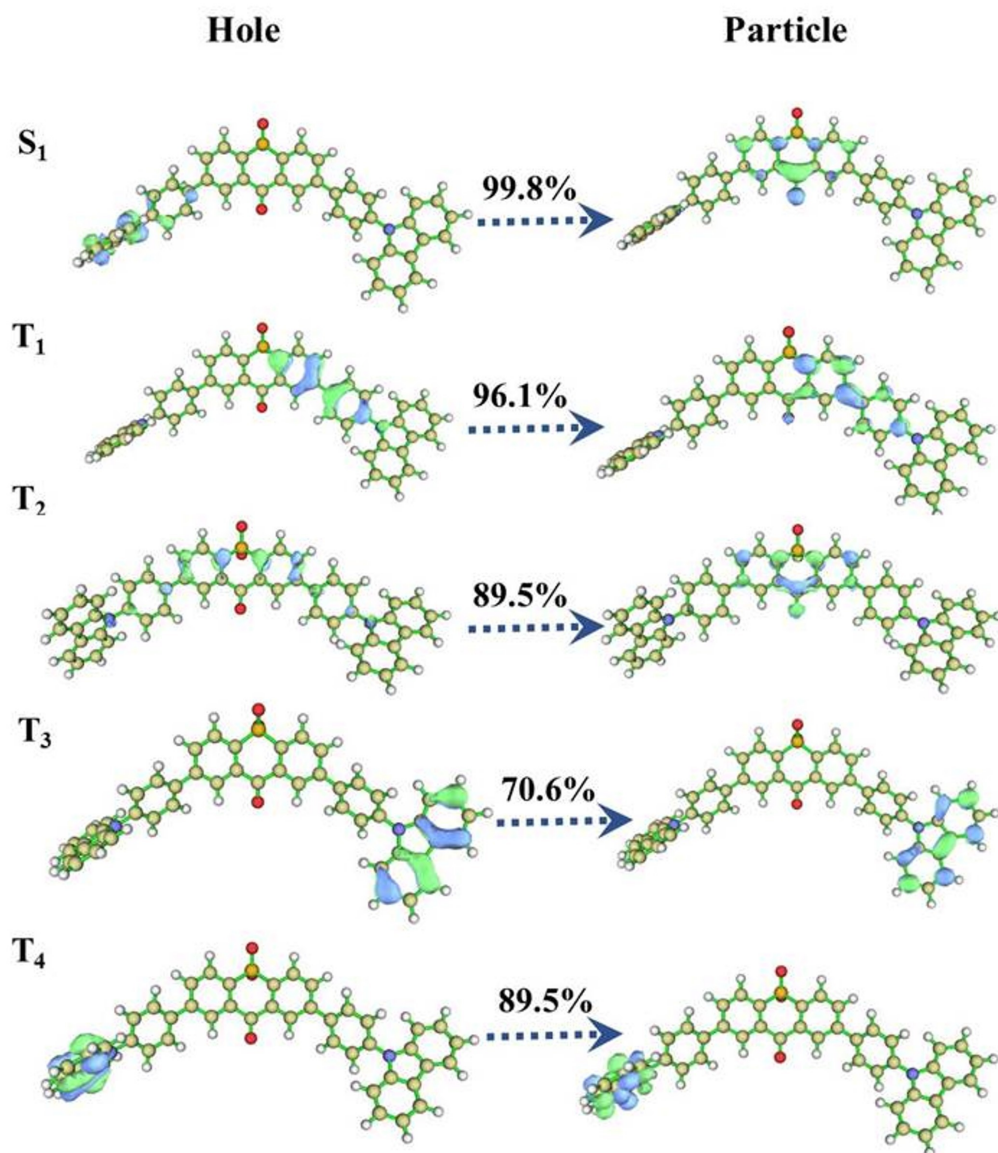

**Figure S4** The natural transition orbitals (NTOs) of  $S_1$ ,  $T_1$  and higher triplet states for DCz-DPh-SOXO.

**Table S1** The SOC values between  $T_1$  and  $S_0$  states and the calculated phosphorescence rates ( $k_p$ ) from  $T_1$  to  $S_0$  state for investigated molecules.

| Molecules    | $\langle T_1   H_{SO}   S_0 \rangle$ (cm <sup>-1</sup> ) | $k_p$ (s <sup>-1</sup> ) |
|--------------|----------------------------------------------------------|--------------------------|
| CzSOXO       | 3.34                                                     | 1.38                     |
| DCzSOXO      | 3.66                                                     | 2.83                     |
| Cz-Ph-SOXO   | 2.63                                                     | 0.11                     |
| DCz-DPh-SOXO | 2.69                                                     | 0.11                     |
